# Supplementary material for: Targeted metabolome profiling by dual-probe microdialysis sampling and treatment using Gardenia jasminoides for rats with type 2 diabetes
Source: PubMed Central journal article supplement (PMC5579158; doi:10.1038/s41598-017-10172-w), 2017-08-31
Supplement: 41598_2017_10172_MOESM1_ESM.pdf [file 41598_2017_10172_MOESM1_ESM.pdf]

# Supplementary Information

## Targeted metabolome profiling by dual-probe microdialysis sampling and treatment using *Gardenia jasminoides* for rats with type 2 diabetes

Lu Wang<sup>1,2†</sup>, Zifeng Pi<sup>1</sup>, Shu Liu<sup>1</sup>, Zhiqiang Liu<sup>1</sup>, Fengrui Song<sup>1\*</sup>

<sup>1</sup> *National Center of Mass Spectrometry in Changchun, Jilin Province Key Laboratory of Chinese  
Medicine Chemistry and Mass Spectrometry, Changchun Institute of Applied Chemistry, Chinese  
Academy of Sciences, Changchun 130022, China*

<sup>2</sup> *University of Chinese Academy of Sciences, Beijing 100039, China*

\* Corresponding authors:

Tel: +86-431-85262044; Fax: +86-431-85262044; E-mail: songfr@ciac.ac.cn (F.Song)

### **CONTENTS**

**Supplementary Method validation**

**Supplementary Figure S1-S2**

**Supplementary Table S1-S6**

## Method validation

The analytical performance parameters were evaluated including linearity, limit of detection (LOD) and the limit of quantification (LOQ), precision (intra and inter-assay), accuracy and matrix effect. A stock solution containing the analytes was diluted with a solution of Ringer's to prepare a series of working standard solutions for calibration and quality control (QC) samples. Calibration curves for analytes were constructed using the peak areas of the quantification MRM transitions against the theoretical concentrations. The LOD and LOQ were measured based on the signal-to-noise ratios of 3:1 and 10:1, respectively. The intra- and inter-day precisions were evaluated by assessing six replicate QC samples in Ringer's solution at three different concentrations on two consecutive days. The relative error (RE) of each QC point served as the measure of accuracy. The post-extraction spike method<sup>18</sup> was adopted in our study to evaluate the matrix effect (ME) that was calculated as follows:

$$ME(\%) = \frac{B-C}{A} \times 100 \quad \text{Equation (2)}$$

The peak areas obtained in neat solution standards were depicted as A, the corresponding peak areas for standards spiked into dialysate as B, and peak areas for analytes in non-spiked dialysate as C.

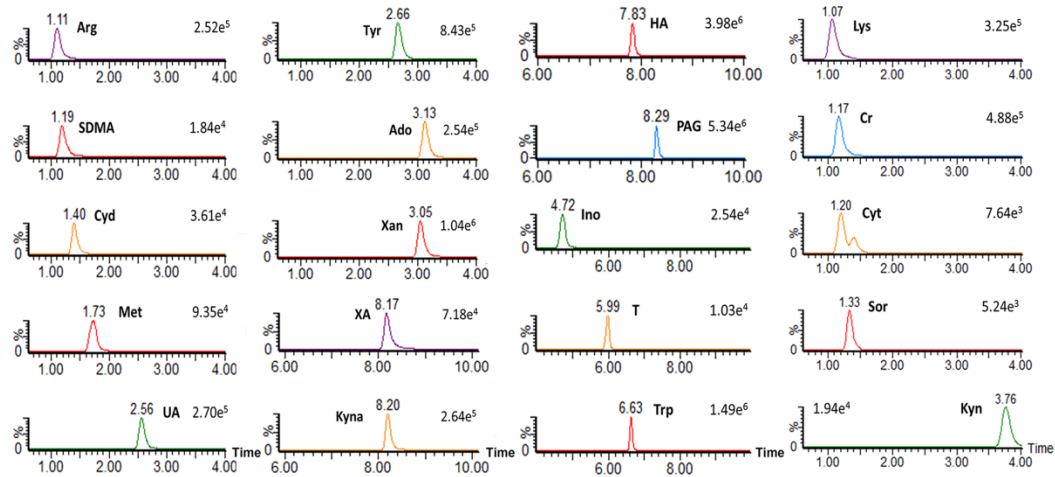

**Supplementary Figure S1** Extracted ion chromatograms of 20 analytes in kidney dialysates of diabetes rats

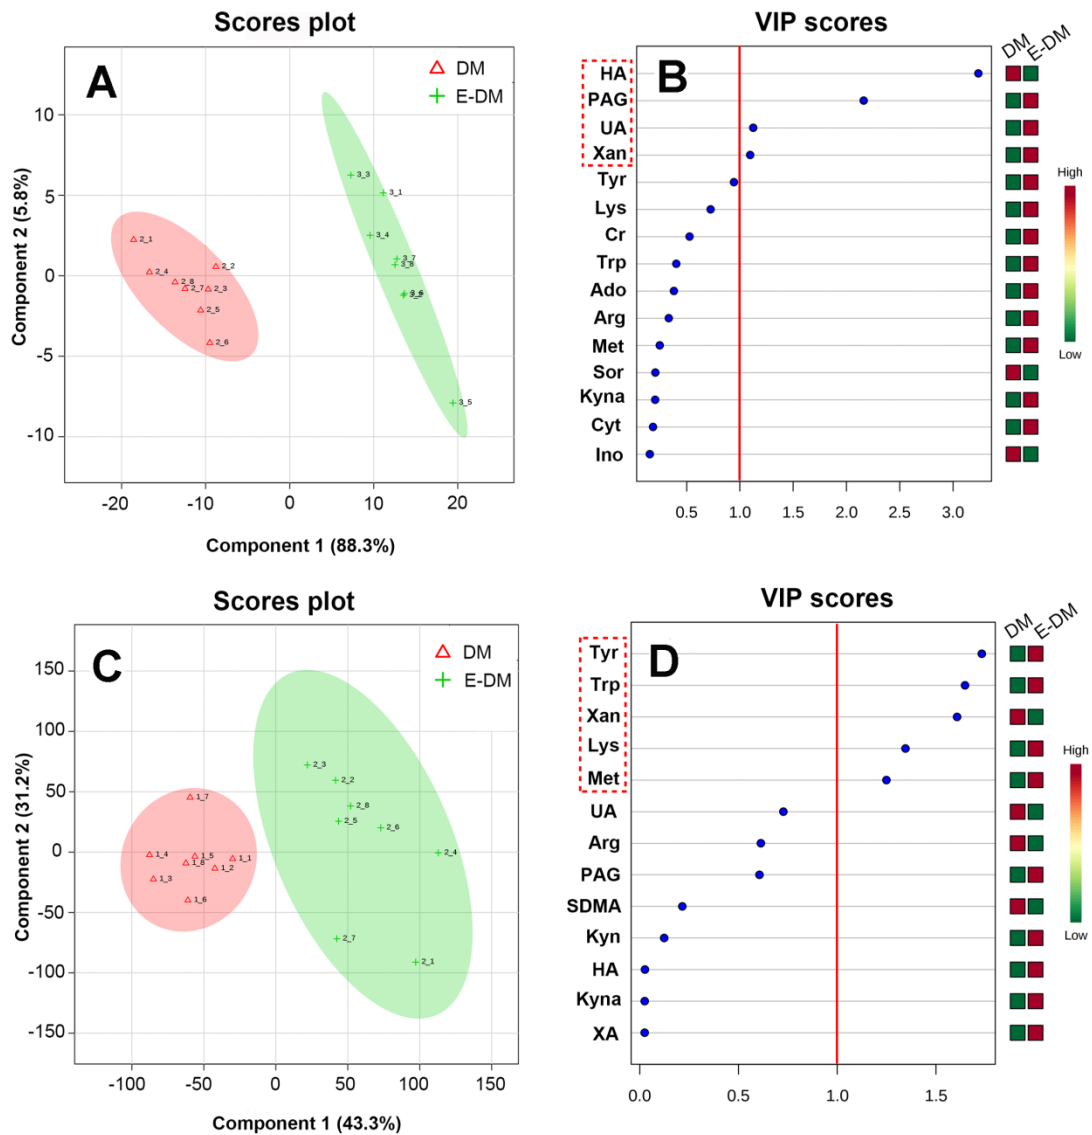

**Supplementary Figure S2** PLS-DA score plots showing a significant separation between E-DM and DM groups in the kidney (A) and blood (C); VIP scores representing the most contributing metabolites involved in the separation between E-DM and DM groups in the kidney (B) and blood (D).

**Supplementary Table S1** Relative recoveries of blood and kidney probes

| Analytes             | RR (%)         |                 |
|----------------------|----------------|-----------------|
|                      | Probe 1(blood) | Probe 2(kidney) |
| Sorbital             | 27.96±0.66     | 27.23±0.78      |
| Creatinine           | 30.93±4.99     | 28.21±1.06      |
| Lysine               | 28.14±1.25     | 22.56±1.02      |
| Methionine           | 24.24±3.80     | 25.99±1.60      |
| Xanthine             | 34.91±1.17     | 23.25±2.37      |
| Uric acid            | 29.55±1.29     | 27.64±0.82      |
| Arginine             | 20.41±0.83     | 23.40±1.00      |
| Tyrosine             | 35.67±1.61     | 21.15±1.99      |
| Cytosine             | 25.12±3.78     | 23.35±4.88      |
| SDMA                 | 31.32±1.07     | 19.80±4.79      |
| Kynurenine           | 28.80±4.44     | 17.57±0.24      |
| Cytidine             | 20.39±3.94     | 18.53±3.88      |
| adenosine            | 13.89±0.72     | 20.67±1.96      |
| Hippuric acid        | 22.99±3.66     | 15.34±5.19      |
| Kynurenate           | 27.70±4.60     | 16.24±0.43      |
| Phenylacetyl glycine | 20.91±2.07     | 17.41±4.99      |
| Xanthurenate         | 29.99±4.34     | 24.41±0.10      |
| Tryptophane          | 29.83±3.17     | 26.54±0.94      |
| Thymidine            | 26.98±4.02     | 20.42±0.90      |
| Inosine              | 39.02±2.55     | 28.51±4.04      |

**Supplementary Table S2** Linearity, LODs and LOQs of 20 analytes

| Analytes             | Dynamic range          | Slope         | Y-intercept    | R <sup>2</sup> | LODs    | LOQs    |
|----------------------|------------------------|---------------|----------------|----------------|---------|---------|
|                      | (ng/mL)                | mean±SD       | mean±SD        |                | (ng/mL) | (ng/mL) |
| Creatinine           | 20-1000                | 0.4007±0.0007 | 2.118±0.205    | 0.9993         | 0.25    | 0.5     |
| Methionine           | 10-500                 | 0.5438±0.0016 | -2.455±0.297   | 0.9987         | 0.5     | 2       |
| Xanthine             | 200-10000              | 0.1977±0.0021 | 41.79±2.66     | 0.9985         | 1       | 5       |
| Uric acid            | 100-5000               | 0.0927±0.0022 | 9.729±1.461    | 0.9971         | 0.5     | 2       |
| Hippuric acid        | 10-500 <sup>a</sup>    | 0.9976±0.0014 | -8.241±0.651   | 0.9973         | 0.25    | 0.5     |
|                      | 500-20000 <sup>b</sup> | 0.5585±0.0071 | 511.9±15.6     | 0.9958         | 0.25    | 0.5     |
| Phenylacetyl glycine | 1.0-10000 <sup>a</sup> | 1.1192±0.0031 | -1.306±0.101   | 0.9995         | 0.075   | 0.25    |
|                      | 500-10000 <sup>b</sup> | 0.8022±0.0023 | 349.2±9.1      | 0.9982         | 0.075   | 0.25    |
| Arginine             | 10-500                 | 1.0020±0.0005 | -0.7046±0.6180 | 0.9975         | 0.1     | 0.5     |
| Tyrosine             | 100-5000               | 0.3465±0.0087 | 10.38±4.33     | 0.9993         | 0.1     | 0.25    |
| Sorbitol             | 10-500                 | 0.0425±0.0000 | -0.286±0.150   | 0.9973         | 0.075   | 2       |
| SDMA                 | 2.0-100                | 0.2503±0.0072 | -0.5304±0.1095 | 0.9996         | 0.25    | 0.5     |
| Lysine               | 100-5000               | 0.1764±0.0025 | 43.13±1.63     | 0.9920         | 0.1     | 1       |
| Kynurenine           | 2.0-100                | 0.5013±0.0084 | -1.046±0.105   | 0.9986         | 0.1     | 0.5     |
| Cytidine             | 1.0-50                 | 0.4545±0.0002 | -0.2754±0.0099 | 0.9969         | 0.1     | 0.5     |
| Adenosine            | 20.0-500               | 1.2734±0.005  | -7.247±0.243   | 0.9996         | 0.25    | 0.5     |
| Kynurenate           | 2.0-100                | 2.3467±0.0016 | 0.2536±0.1320  | 0.9969         | 0.1     | 0.5     |
| Xanthurenate         | 5.0-200                | 1.120±0.0371  | -1.646±1.233   | 0.9996         | 0.05    | 0.1     |
| Tryptophane          | 100-2000               | 0.9003±0.0264 | 19.55±12.59    | 0.9966         | 0.5     | 5       |
| Thymidine            | 5.0-200                | 0.0727±0.0013 | -0.235±0.076   | 0.9987         | 1       | 5       |
| Inosine              | 5-100                  | 0.3672±0.0005 | -0.0993±0.0503 | 0.9956         | 0.25    | 2       |
| Cytosine             | 20-500                 | 0.0741±0.0002 | -1.444±0.076   | 0.9970         | 0.25    | 10      |

<sup>a</sup>dynamic range of blood dialysates ; <sup>b</sup>dynamic range of kidney tissue dialysates

**Supplementary Table S3** Summary of precision, accuracy and matrix effect

| Analytes            | Added<br>ng/mL | Intra-day       |                   |                 | Inter-day       |                   |                 | Matrix effect%<br>ME% |
|---------------------|----------------|-----------------|-------------------|-----------------|-----------------|-------------------|-----------------|-----------------------|
|                     |                | Observed        | Precision<br>RSD% | Accuracy<br>RE% | Observed        | Precision<br>RSD% | Accuracy<br>RE% |                       |
| Creatinine          | 20             | 20.68±1.94      | 9.38              | 3.38            | 21.39±2.58      | 10.79             | 1.13            | 93.32±5.90            |
|                     | 100            | 97.10±4.42      | 4.56              | -2.90           | 93.59±4.52      | 4.84              | -6.41           | 96.24±9.05            |
|                     | 500            | 486.07±4.45     | 0.92              | -2.79           | 482.21±27.09    | 5.62              | -3.56           | 89.20±2.18            |
| Methionine          | 20             | 21.09 ±0.70     | 3.33              | 5.43            | 20.89 ±0.83     | 3.97              | 4.43            | 88.16±4.74            |
|                     | 100            | 93.86 ±5.79     | 6.17              | -6.14           | 94.20 ±6.27     | 6.65              | -5.80           | 88.85±0.75            |
|                     | 500            | 487.30 ±34.29   | 7.04              | -2.54           | 490.64 ±36.29   | 7.40              | -1.87           | 96.72±1.78            |
| Xanthine            | 500            | 448.44±18.97    | 4.23              | -10.31          | 445.08±41.00    | 9.21              | -10.98          | 88.17±2.15            |
|                     | 2000           | 2145.10±51.76   | 2.41              | 7.26            | 2145.56±72.89   | 3.40              | 7.28            | 92.15±1.34            |
|                     | 10000          | 9791.74±214.88  | 2.19              | -0.78           | 9980.70±327.66  | 3.28              | -0.91           | 103.00±0.92           |
| Uric acid           | 500            | 500.25±5.37     | 1.07              | 0.05            | 504.01±29.34    | 5.82              | 0.80            | 103.54±2.09           |
|                     | 1000           | 1078.61±63.04   | 5.84              | 7.86            | 1100.20±47.93   | 4.32              | 10.02           | 104.13±2.55           |
|                     | 5000           | 4982.60±202.94  | 4.07              | -0.35           | 4945.23±203.30  | 4.11              | -1.10           | 102.85±2.68           |
| Hippuric acid       | 100            | 95.96±3.91      | 4.07              | -4.04           | 92.97±4.65      | 5.00              | -7.03           | 108.97±3.72           |
|                     | 500            | 470.54±13.54    | 2.88              | -5.89           | 493.49±25.25    | 5.12              | -1.30           | 105.86±1.17           |
|                     | 10000          | 11266.95±502.52 | 4.46              | 12.67           | 10997.74±498.72 | 4.53              | 9.98            | 97.95±1.04            |
| Phenylacetylglycine | 20             | 21.08±0.95      | 4.50              | 5.39            | 19.75±1.94      | 9.84              | -1.23           | 99.20±5.28            |
|                     | 1000           | 1066.00±34.31   | 3.22              | 6.60            | 984.93±115.15   | 11.69             | -1.51           | 96.97±0.78            |
|                     | 5000           | 5358.83 ±143.97 | 2.69              | 7.18            | 5323.00±154.37  | 2.90              | 6.46            | 100.12±1.74           |
|                     | 50             | 52.52 ±4.91     | 9.35              | 5.03            | 52.02 ±5.46     | 10.49             | 4.03            | 88.12±1.98            |

|            |      |                 |      |        |                 |       |        |              |
|------------|------|-----------------|------|--------|-----------------|-------|--------|--------------|
| Arginine   | 200  | 191.48 ±1.88    | 6.20 | -4.26  | 186.99 ±11.88   | 6.35  | -6.50  | 91.87±1.03   |
|            | 500  | 473.97 ±31.00   | 6.54 | -5.21  | 481.61 ±33.45   | 6.95  | -3.68  | 88.88±1.72   |
| Tyrosine   | 200  | 180.28 ±2.61    | 1.45 | -9.86  | 202.56 ±8.58    | 4.24  | 1.28   | 102.83±4.36  |
|            | 1000 | 977.82 ±22.01   | 2.25 | -2.22  | 1065.33 ±84.83  | 7.96  | 6.53   | 94.67±0.63   |
|            | 5000 | 5063.54±70.05   | 1.38 | 1.27   | 4680.39 ±155.62 | 3.32  | -6.39  | 98.51±0.83   |
| Sorbital   | 50   | 53.60±4.47      | 8.33 | 7.21   | 50.11 ±5.89     | 11.76 | 0.22   | 92.34±8.54   |
|            | 100  | 94.13±1.12      | 1.19 | -5.87  | 94.83±4.67      | 4.93  | -5.17  | 88.76±1.98   |
| SDMA       | 200  | 184.61±6.49     | 3.51 | -7.69  | 193.44±11.54    | 5.96  | -3.28  | 93.25±4.80   |
|            | 10   | 10.91 ±0.69     | 6.33 | 9.09   | 11.15 ±0.96     | 8.63  | 11.47  | 90.20±8.69   |
|            | 50   | 54.82 ±4.30     | 7.84 | 9.63   | 53.72 ±5.74     | 10.68 | 7.63   | 96.93±4.04   |
| Lysine     | 100  | 108.89 ±1.29    | 1.18 | 8.89   | 105.68 ±6.17    | 5.84  | 5.68   | 95.88±4.08   |
|            | 200  | 200.38 ±17.85   | 8.91 | 0.19   | 192.60 ±21.31   | 11.07 | -3.70  | 91.77±3.71   |
|            | 500  | 462.45 ±32.09   | 6.94 | -7.51  | 480.19 ±34.35   | 7.15  | -3.96  | 96.39±2.75   |
| Kynurenine | 2000 | 2184.38 ±132.64 | 6.07 | 9.22   | 2197.61 ±143.80 | 6.54  | 9.88   | 92.74±1.03   |
|            | 10   | 8.88±0.44       | 9.42 | -11.18 | 8.94±0.52       | 5.87  | -10.57 | 103.55±11.02 |
|            | 20   | 19.82±0.09      | 0.43 | -0.89  | 18.93±1.64      | 8.56  | -5.36  | 96.94±9.35   |
| Cytidine   | 50   | 54.43±1.45      | 2.66 | 8.86   | 50.73 ±3.06     | 6.04  | 1.05   | 95.69±2.93   |
|            | 5    | 4.49 ±0.04      | 0.90 | -10.15 | 4.68 ±0.07      | 1.52  | -6.34  | 91.94±1.83   |
|            | 10   | 9.64 ±0.49      | 5.13 | -3.57  | 9.15 ±0.53      | 5.77  | -8.05  | 99.42±6.89   |
| Adenosine  | 20   | 20.65 ±1.57     | 7.60 | 3.24   | 19.69 ±2.45     | 12.46 | -1.55  | 89.35±2.00   |
|            | 50   | 52.91 ±1.98     | 3.74 | 5.81   | 53.51 ±2.10     | 3.93  | 7.02   | 105.44±4.50  |
|            | 100  | 99.69 ±3.74     | 3.75 | -0.31  | 98.42 ±4.18     | 4.25  | -1.58  | 99.45±2.17   |
| Kynurenate | 200  | 201.13 ±8.17    | 4.06 | 0.56   | 199.58±9.56     | 4.79  | -0.21  | 104.31 ±2.84 |
|            | 5    | 4.88±0.46       | 9.49 | -2.37  | 4.77±0.52       | 10.80 | -4.55  | 93.99±4.08   |
|            | 20   | 20.07±1.24      | 6.18 | 0.34   | 19.43±1.86      | 9.59  | -2.85  | 99.72±4.69   |

|             |      |               |      |       |                 |       |       |              |
|-------------|------|---------------|------|-------|-----------------|-------|-------|--------------|
|             | 100  | 104.42±5.95   | 5.70 | 4.42  | 106.01±7.12     | 6.71  | 6.01  | 99.30±0.98   |
|             | 5    | 5.18±0.24     | 4.58 | 3.60  | 5.54 ±0.70      | 12.61 | 10.82 | 99.66±9.28   |
| Xanthureate | 100  | 111.96±3.78   | 3.38 | 11.96 | 110.09±5.95     | 5.41  | 10.09 | 97.53±2.36   |
|             | 200  | 216.41±9.11   | 4.21 | 8.21  | 213.17 ±9.02    | 4.23  | 6.59  | 100.31±2.36  |
|             | 200  | 192.77 ±11.66 | 6.05 | -3.62 | 189.48 ±12.49   | 6.59  | -5.26 | 98.89±1.15   |
| Tryptophane | 500  | 460.19 ±8.52  | 1.85 | -7.96 | 487.25 ±39.40   | 8.09  | -2.55 | 96.79±0.56   |
|             | 1000 | 976.94 ±45.89 | 4.70 | -2.31 | 1047.37 ±101.78 | 9.72  | 4.74  | 95.24±0.96   |
|             | 20   | 20.96±0.11    | 0.52 | 4.79  | 20.46±1.15      | 5.62  | 2.30  | 88.28±9.66   |
| Thymidine   | 100  | 94.92±8.09    | 8.53 | -5.08 | 94.28±10.84     | 11.50 | -5.72 | 94.87±6.13   |
|             | 200  | 186.29±3.28   | 1.76 | -6.85 | 186.31±7.15     | 3.84  | -6.84 | 93.31 ±4.53  |
|             | 20   | 19.97±0.99    | 4.97 | -0.13 | 19.47±1.49      | 7.56  | -2.67 | 102.30±5.04  |
| Inosine     | 50   | 53.43±0.55    | 1.02 | 6.87  | 53.31±4.00      | 7.51  | 6.61  | 105.49±4.13  |
|             | 100  | 100.95±5.14   | 5.09 | 0.95  | 106.67±6.04     | 5.66  | 6.67  | 107.11 ±4.23 |
|             | 50   | 50.62 ±3.32   | 6.57 | 1.23  | 50.57 ±4.07     | 8.05  | 1.14  | 93.89±9.07   |
| Cytosine    | 100  | 99.10 ±6.43   | 6.49 | -0.90 | 99.45 ±7.99     | 8.03  | -0.55 | 89.98±4.74   |
|             | 200  | 183.76±16.25  | 8.84 | -8.12 | 194.45 ±17.62   | 9.06  | -2.77 | 91.81±8.25   |

---



**Supplementary Table S4** The main disturbed metabolic pathways

| Pathways name                                       | Impact               |                   |                      |                   |
|-----------------------------------------------------|----------------------|-------------------|----------------------|-------------------|
|                                                     | kidney               |                   | blood                |                   |
|                                                     | Control vs. DM model | G-DM vs. DM model | Control vs. DM model | G-DM vs. DM model |
| Phenylalanine, tyrosine and tryptophan biosynthesis | 0.5                  | 0.5               | 0.5                  | 0.5               |
| Tryptophan metabolism                               | 0.2870               | -                 | 0.2870               | 0.1772            |
| Tyrosine metabolism                                 | 0.1405               | 0.1405            | 0.1405               | 0.1405            |
| Cysteine and methionine metabolism                  | 0.0869               | -                 | 0.0869               | -                 |
| Arginine and proline metabolism                     | 0.0823               | -                 | 0.0823               | 0.0823            |
| Pyrimidine metabolism                               | 0.0619               | -                 | -                    | -                 |
| Purine metabolism                                   | 0.0573               | 0.0537            | 0.0537               | 0.0329            |
| Fructose and mannose metabolism                     | 0.0314               | -                 | -                    | -                 |

**Supplementary Table S5** Multiple reaction monitoring (MRM) parameters for 20 analytes

| Analytes     | Cone voltage(V) | Quantitation transition (m/z)      | Confirmation transition (m/z)      | Function |
|--------------|-----------------|------------------------------------|------------------------------------|----------|
|              |                 | Collision energy <sup>a</sup> (eV) | Collision energy <sup>a</sup> (eV) |          |
| Cytosine     | 18              | 112.09>95.01 (25)                  | 112.09>52.05 (25)                  | 1        |
| Creatinine   | 20              | 114.03>86.09 (10)                  | 114.03>44.14 (14)                  | 1        |
| Lysine       | 16              | 147.09>84.13(16)                   | 147.09>56.1 (26)                   | 1        |
| Methionine   | 14              | 150.05>132.99 (10)                 | 150.05>104.04 (14)                 | 1        |
| Xanthine     | 24              | 152.98>135.95 (21)                 | 152.98>109.97 (18)                 | 1        |
| Uric acid    | 24              | 169.01>141.07 (16)                 | 169.01>70.07 (22)                  | 1        |
| Arginine     | 20              | 175.03>70.13 (20)                  | 175.03>60.11 (12)                  | 1        |
| SDMA         | 20              | 203.1>115.99 (18)                  | 203.1>70.21 (26)                   | 1        |
| Tyrosine     | 18              | 182.02>165.02 (12)                 | 182.02>136.01 (16)                 | 1        |
| Sorbital     | 10              | 183.01>129.04 (10)                 | 183.01>69 (12)                     | 1        |
| Kynurenine   | 16              | 209.05>146.07 (20)                 | 205.06>94.06 (16)                  | 1        |
| Cytidine     | 10              | 244.06>112.01 (8)                  | 244.06>94.98 (40)                  | 1        |
| Adenosine    | 18              | 268.08>136.06 (18)                 | 268.08>119.03 (42)                 | 1        |
| N,N-Phe (IS) | 22              | 194.21>133.05 (26)                 | 194.21>148.16 (16)                 | 2        |
| Tryptophane  | 14              | 205.01>146.04 (18)                 | 205.01>118.01 (26)                 | 2        |

|                     |    |                    |                    |   |
|---------------------|----|--------------------|--------------------|---|
| Thymidine           | 10 | 243.01>126.96 (6)  | 243.01>109.98 (38) | 2 |
| Inosine             | 10 | 269.07>137.04 (16) | 269.07>110.05 (40) | 2 |
| Hippuric acid       | 12 | 180.01>105.06 (18) | 180.01>77.04 (24)  | 3 |
| Kynurenate          | 24 | 190.01>144.06 (16) | 190.01>116.11 (28) | 3 |
| Phenylacetylglycine | 12 | 194.04>91.08 (20)  | 194.04>76.06 (10)  | 3 |
| Xanthurenate        | 22 | 206.01>160.06 (20) | 206.01>132.04 (28) | 3 |

---

<sup>a</sup> The values of collision energy (eV) are given in the brackets.

### Biochemical analyses

The renal function related parameters in control and DM groups were assayed. The concentrations of albumin in urine samples, serum creatinine (Scr) and urea nitrogen (BUN) were determined by the commercial assay kits (Nanjing Jiancheng, Institute of Biotechnology, Nanjing, China). And 24-h urinary albumin excretion rate (UAER) was calculated.

**Supplementary Table S6 Renal functional parameters of rats in different groups**

| Group   | UAER (mg/24h)     | BUN (mmol/L)      | Scr ( $\mu$ mol/L) |
|---------|-------------------|-------------------|--------------------|
| Control | 4.32 $\pm$ 0.35** | 4.39 $\pm$ 0.27** | 96.22 $\pm$ 7.11** |
| DM      | 31.26 $\pm$ 3.25  | 8.14 $\pm$ 0.26   | 145.86 $\pm$ 10.86 |

\*\*  $p$ <0.01 vs. DM group.
